# Supplementary material for: A Lightweight Internet Sharing Scheme for Sectional Medical Images according to Existing Hospital Network Facilities and Basic Information Security Rules
Source: Hindawi journal article supplement (doi:10.1155/2020/8838390), 2020-12-04
Supplement: f1 [file 8838390.f1.zip]

## Introduction to the video of prototype system demonstration

for lightweight accessing of Sectional Medical Images from *hospital Intranet* by Internet users

The final high quality image of MPR and MIPs was accessed by remote rendering, the interactions of *Slave* model, window-levelling and dimension measurement were run on the client side.

### *Detail:*

- (1) First loading
  - i. Open the application 00:00:07
  - ii. Enter the ID number of PACS, wait the *Slave* model loading 00:00:12
- (2) Interactive behavior
  - i. MPR browsing: *Slave* model interaction and requesting the remote rendering 00:00:21
  - ii. Window adjustment on the local client side 00:00:41
  - iii. MPR browsing: *Slave* model interaction and requesting the remote rendering 00:00:49
  - iv. MIP browsing: setting the MIP interval area on the *Slave* model and requesting the remote rendering 00:00:58
  - v. Window adjustment on the local client side 00:01:19
  - vi. Dimension measurement on the local client side 00:01:28
