# Supplementary material for: A Lightweight Internet Sharing Scheme for Sectional Medical Images according to Existing Hospital Network Facilities and Basic Information Security Rules
Source: J Healthc Eng. 2020 Dec 4;2020:8838390. doi: 10.1155/2020/8838390 (PMC7737442; doi:10.1155/2020/8838390)
Supplement: Supplementary Materials — A video of the prototype system demonstration can be downloaded from supplementary materials. [file 8838390.f1.zip]

Archive with 2 entries (2 files):
- 8838390.f1/Introduction to the video of prototype system demonstration.pdf
- 8838390.f1/Video of Prototype system demonstration.mp4
